# Supplementary material
Source: MDPI journal article supplement (https://www.mdpi.com/2076-3417/14/7/2764)
Supplement: s1 [file s1]

Table 1. Summary of case study data in [kWh].

| Day number | Real production | Constant | Optimized | Day number | Real production | Constant | Optimized | Day number | Real production | Constant | Optimized |
|------------|-----------------|----------|-----------|------------|-----------------|----------|-----------|------------|-----------------|----------|-----------|
| March      |                 |          |           | May        |                 |          |           | December   |                 |          |           |
| 1          | 14.50           | 20.68    | 9.40      | 1          | 7.90            | 20.68    | 12.04     | 1          | 2.80            | 20.68    | 12.13     |
| 2          | 51.10           | 20.68    | 33.69     | 2          | 9.10            | 20.68    | 6.51      | 2          | 9.60            | 20.68    | 7.95      |
| 3          | 50.00           | 20.68    | 34.53     | 3          | 24.30           | 20.68    | 8.81      | 3          | 0.10            | 20.68    | 11.01     |
| 4          | 4.10            | 20.68    | 8.66      | 4          | 31.30           | 20.68    | 11.84     | 4          | 10.70           | 20.68    | 26.51     |
| 5          | 38.90           | 20.68    | 23.13     | 5          | 38.90           | 20.68    | 26.07     | 5          | 13.40           | 20.68    | 29.83     |
| 6          | 48.30           | 20.68    | 33.76     | 6          | 56.20           | 20.68    | 25.15     | 6          | 11.20           | 20.68    | 61.28     |
| 7          | 9.00            | 20.68    | 8.75      | 7          | 23.70           | 20.68    | 10.33     | 7          | 4.10            | 20.68    | 15.19     |
| 8          | 44.70           | 20.68    | 24.40     | 8          | 54.00           | 20.68    | 27.53     | 8          | 2.90            | 20.68    | 12.28     |
| 9          | 55.70           | 20.68    | 35.47     | 9          | 64.70           | 20.68    | 27.34     | 9          | 1.10            | 20.68    | 9.71      |
| 10         | 55.10           | 20.68    | 36.32     | 10         | 65.10           | 20.68    | 30.90     | 10         | 0.00            | 20.68    | 3.90      |
| 11         | 4.10            | 20.68    | 5.23      | 11         | 69.10           | 20.68    | 29.65     | 11         | 1.90            | 20.68    | 7.55      |
| 12         | 20.40           | 20.68    | 15.90     | 12         | 45.70           | 20.68    | 29.99     | 12         | 0.20            | 20.68    | 6.50      |
| 13         | 20.20           | 20.68    | 13.10     | 13         | 36.40           | 20.68    | 22.20     | 13         | 0.80            | 20.68    | 7.43      |
| 14         | 12.50           | 20.68    | 12.37     | 14         | 9.20            | 20.68    | 12.11     | 14         | 7.50            | 20.68    | 12.64     |
| 15         | 21.00           | 20.68    | 13.99     | 15         | 53.20           | 20.68    | 26.40     | 15         | 8.50            | 20.68    | 12.58     |
| 16         | 7.40            | 20.68    | 13.67     | 16         | 35.70           | 20.68    | 19.92     | 16         | 0.50            | 20.68    | 10.95     |
| 17         | 20.30           | 20.68    | 13.88     | 17         | 57.30           | 20.68    | 22.02     | 17         | 15.20           | 20.68    | 17.79     |
| 18         | 23.30           | 20.68    | 10.73     | 18         | 30.10           | 20.68    | 16.81     | 18         | 15.60           | 20.68    | 38.44     |
| 19         | 21.00           | 20.68    | 18.55     | 19         | 41.20           | 20.68    | 21.01     | 19         | 1.90            | 20.68    | 8.64      |
| 20         | 35.40           | 20.68    | 21.58     | 20         | 46.60           | 20.68    | 27.62     | 20         | 20.40           | 20.68    | 35.11     |
| 21         | 8.30            | 20.68    | 7.00      | 21         | 60.80           | 20.68    | 26.66     | 21         | 9.50            | 20.68    | 23.57     |
| 22         | 55.90           | 20.68    | 32.49     | 22         | 41.10           | 20.68    | 15.14     | 22         | 0.70            | 20.68    | 0.00      |
| 23         | 12.30           | 20.68    | 9.24      | 23         | 43.40           | 20.68    | 25.05     | 23         | 5.00            | 20.68    | 24.70     |
| 24         | 14.10           | 20.68    | 11.94     | 24         | 61.00           | 20.68    | 27.49     | 24         | 15.00           | 20.68    | 39.09     |
| 25         | 48.70           | 20.68    | 33.84     | 25         | 34.00           | 20.68    | 14.58     | 25         | 1.20            | 20.68    | 7.76      |
| 26         | 48.30           | 20.68    | 31.33     | 26         | 31.40           | 20.68    | 20.69     | 26         | 15.00           | 20.68    | 23.97     |
| 27         | 25.70           | 20.68    | 17.17     | 27         | 32.70           | 20.68    | 14.05     | 27         | 9.70            | 20.68    | 15.76     |
| 28         | 42.90           | 20.68    | 26.88     | 28         | 29.60           | 20.68    | 16.11     | 28         | 3.10            | 20.68    | 8.59      |
| 29         | 21.10           | 20.68    | 8.05      | 29         | 30.40           | 20.68    | 11.19     | 29         | 7.60            | 20.68    | 5.64      |
| 30         | 57.70           | 20.68    | 36.93     | 30         | 51.10           | 20.68    | 24.67     | 30         | 25.70           | 20.68    | 80.09     |
| 31         | 57.10           | 20.68    | 39.03     | 31         | 72.60           | 20.68    | 31.12     | 31         | 19.60           | 20.68    | 64.38     |
